# Supplementary material for: Oral Supplementation of Sodium Butyrate Attenuates the Progression of Non-Alcoholic Steatohepatitis
Source: MDPI journal article supplement (doi:10.3390/nu12040951), 2020-03-30
Supplement: s1 [file s1]

# **Oral supplementation of sodium butyrate attenuates the progression of non-alcoholic steatohepatitis**

*Nutrients*

Anja Baumann, Cheng Jun Jin, Annette Brandt, Cathrin Sellmann, Anika Nier, Markus Burkard, Sascha Venturelli, Ina Bergheim<sup>#</sup>

**# Corresponding author:** Ina Bergheim, Ph.D.  
University of Vienna  
Department of Nutritional Sciences  
Molecular Nutritional Science  
Althanstraße 14 (UZA II)  
A-1090 Vienna  
Email address: [ina.bergheim@univie.ac.at](mailto:ina.bergheim@univie.ac.at)

**Table S1. Primer sequences used for real-time PCR.**

|              | <b>Forward (5'- 3')</b>  | <b>Reverse (5'- 3')</b>  |
|--------------|--------------------------|--------------------------|
| <i>18S</i>   | gtaacccgttgaacccatt      | ccatccaatcggtagtagcg     |
| <i>αSma</i>  | ctgacagaggcaccactgaa     | catctccagagtccagcaca     |
| <i>Aanat</i> | gcttctcctagtcacagacccc   | agcggaaactcactggcaggg    |
| <i>Hiomt</i> | ccctggcggtccaccttcctg    | atggcgggtgaaggggtcgtc    |
| <i>Il1β</i>  | tggctgtggagaagctgtgg     | gtccgacagcacagaggcttt    |
| <i>Il6</i>   | ccacgccttcctacttca       | tgcaagtgcacatcgttggtc    |
| <i>iNos</i>  | cccctggaagtttctcttcaaagt | gattctggaacatctgtgctgtcc |
| <i>Mtr1a</i> | aatgccactcagcaggctccag   | agcagggtgccagaatgtcca    |
| <i>Mtr1b</i> | agggtaccgtgcctgtcaa      | aggtttgctgctaggccact     |
| <i>Myd88</i> | caaaagtggggtgcctttgc     | aaatccacagtgtccccaga     |
| <i>Tgfβ</i>  | gtctgggaccctgccctat      | ttgcaggagcgcacaatcat     |
| <i>Tlr4</i>  | agccattgctgccaacatca     | gctgcctcagcagggacttc     |
| <i>Tnfa</i>  | cagccaaccaggcagcgttcct   | cctgccacaagcaggaatga     |

αSma, alpha smooth muscle actin; Aanat, serotonin N-acetyltransferase; Hiomt, hydroxyindole-O-methyltransferase; Il, interleukin; iNos, inducible nitric oxide synthase; Mtr, melatonin receptor; Myd88, myeloid differentiation primary response gene 88; Tgfβ, transforming growth factor beta; Tlr4, toll-like receptor 4; Tnfa, tumor necrosis factor alpha. Expressions were normalized to 18S mRNA expression.

**Table S2. Effect of an oral supplementation of SoB on fibrosis markers in livers of mice with FFC-induced NASH.**

|                                                        | Diet groups               |                           |                           |                           | <i>p</i> (two-way ANOVA) |       |       |
|--------------------------------------------------------|---------------------------|---------------------------|---------------------------|---------------------------|--------------------------|-------|-------|
|                                                        | C                         | FFC                       | C + SoB                   | FFC + SoB                 | DExSoBE                  | SoBE  | DE    |
| <b>Sirius red staining</b><br>(% of microscopic field) | 1.2 ± 0.2 <sup>a</sup>    | 1.5 ± 0.4 <sup>a</sup>    | 0.8 ± 0.1 <sup>a</sup>    | 1.1 ± 0.1 <sup>a</sup>    | >0.05                    | >0.05 | >0.05 |
| <b><i>αSma</i> mRNA expression</b><br>(% of control)   | 100.0 ± 13.5 <sup>a</sup> | 177.5 ± 47.8 <sup>a</sup> | 192.1 ± 57.1 <sup>a</sup> | 262.3 ± 81.5 <sup>a</sup> | >0.05                    | >0.05 | >0.05 |
| <b><i>Tgfb</i> mRNA expression</b><br>(% of control)   | 100.0 ± 15.4 <sup>a</sup> | 129.8 ± 29.4 <sup>a</sup> | 82.0 ± 17.3 <sup>a</sup>  | 157.2 ± 31.4 <sup>a</sup> | >0.05                    | >0.05 | <0.05 |

Data are shown as means ± SEM, n = 7-8. Data with different letters are significantly different, *p* < 0.05. *αSma*, alpha smooth muscle actin; C, control diet; DE, diet effect; DExSoBE, interaction between diet and SoB; FFC, fat-, fructose-, and cholesterol-rich diet; NASH, non-alcoholic steatohepatitis; SoB, sodium butyrate; SoBE; sodium butyrate effect; *Tgfb*, transforming necrosis factor beta.

**Table S3. Effect of SoB on NO<sub>2</sub><sup>-</sup> concentration as well as mRNA expression of *iNos* and proinflammatory mediators in J774A.1 cells.**

|                                                       | Treatment groups       |                               |                           |                               | <i>p</i> (two-way ANOVA) |       |       |
|-------------------------------------------------------|------------------------|-------------------------------|---------------------------|-------------------------------|--------------------------|-------|-------|
|                                                       | C                      | LPS                           | C + SoB                   | LPS + SoB                     | LPSExSoBE                | SoBE  | LPSE  |
| <b>NO<sub>2</sub><sup>-</sup> (% of control)</b>      | 100.0 ± 0 <sup>b</sup> | 6,379 ± 2,131 <sup>a</sup>    | 76.6 ± 30.4 <sup>b</sup>  | 4,240 ± 1,419 <sup>a</sup>    | >0.05                    | >0.05 | <0.05 |
| <b><i>iNos</i> mRNA expression<br/>(% of control)</b> | 100.0 ± 0 <sup>b</sup> | 8,399 ± 2,284 <sup>a</sup>    | 232.3 ± 37.5 <sup>c</sup> | 11,823 ± 1,790 <sup>a</sup>   | >0.05                    | <0.05 | <0.05 |
| <b><i>Tnfa</i> mRNA expression<br/>(% of control)</b> | 100.0 ± 0 <sup>b</sup> | 607.8 ± 148.3 <sup>a</sup>    | 137.9 ± 16.3 <sup>b</sup> | 698.4 ± 223.6 <sup>a</sup>    | >0.05                    | >0.05 | <0.05 |
| <b><i>Il1β</i> mRNA expression<br/>(% of control)</b> | 100.0 ± 0 <sup>b</sup> | 116,264 ± 28,490 <sup>a</sup> | 151.0 ± 28.1 <sup>b</sup> | 315,263 ± 89,146 <sup>a</sup> | >0.05                    | >0.05 | <0.05 |
| <b><i>Il6</i> mRNA expression<br/>(% of control)</b>  | 100.0 ± 0 <sup>b</sup> | 716 ± 131 <sup>a</sup>        | 142.1 ± 20.3 <sup>b</sup> | 851.3 ± 210.8 <sup>a</sup>    | >0.05                    | >0.05 | <0.05 |

Data are shown as means ± SEM, n = 5. Data with different letters are significantly different, *p* < 0.05. C, control; Il, interleukin; LPS, lipopolysaccharide; LPSE, LPS effect; LPSExSoBE, interaction between LPS and SoB; *iNos*, inducible nitric oxide synthase; NO, nitric oxide; SoB, sodium butyrate; SoBE; sodium butyrate effect; *Tnfa*, tumor necrosis factor alpha.

**Table S4. Effect of SoB on mRNA expression of melatonin receptor, Aanat and Hiomt in small intestinal tissue of an everted gut sac model.**

|                                                        | Treatment groups          |                           |                           |
|--------------------------------------------------------|---------------------------|---------------------------|---------------------------|
|                                                        | C                         | 3 mM SoB                  | 6 mM SoB                  |
| <b><i>Mtr1a</i> mRNA expression</b><br>(% of control)  | 100.0 ± 32.9 <sup>a</sup> | 134.7 ± 15.0 <sup>a</sup> | 178.0 ± 33.5 <sup>a</sup> |
| <b><i>Mtr1b</i> mRNA expression</b><br>(% of control)  | ND                        | ND                        | ND                        |
| <b><i>Aanat</i> mRNA expression</b><br>(% of control)  | 100.0 ± 15.3 <sup>a</sup> | 81.78 ± 11.0 <sup>a</sup> | 105 ± 9.7 <sup>a</sup>    |
| <b><i>Hioimt</i> mRNA expression</b><br>(% of control) | ND                        | ND                        | ND                        |

Data are shown as means ± SEM, n = 5-6. Data with different letters are significantly different,  $p < 0.05$ . C, everted gut sacs incubated only in 1x Krebs-Henseleit-bicarbonate-buffer; Aanat, serotonin N-acetyltransferase; Hiomt, hydroxyindole-O-methyltransferase; *Mtr*, melatonin receptor; ND, not detectable; SoB, sodium butyrate.
